# Supplementary material for: Unlocking the potential of alkaline-earth metal active centers for nitrogen activation and ammonia synthesis: the role of s–d orbital synergy
Source: Royal Society of Chemistry journal article supplement (doi:10.1039/d3ta07311d), 2024-01-01
Supplement: d3ta07311d1.pdf [file d3ta07311d1.pdf]

*Supporting information of*

**Unlocking the potential of alkaline-earth metal active centers for nitrogen activation and ammonia synthesis: the role of s-d orbital synergy**

Donghai Wu<sup>1,2</sup>, Jiarui Wu<sup>1</sup>, Haobo Li<sup>1</sup>, Wenjing Lv<sup>1</sup>, Yanhao Song<sup>1</sup>, Dongwei Ma<sup>1\*</sup>, and Yu Jia<sup>1\*</sup>

<sup>1</sup>Key Laboratory for Special Functional Materials of Ministry of Education, School of Materials Science and Engineering, Henan University, Kaifeng 475004, China

<sup>2</sup>Henan Key Laboratory of Nanocomposites and Applications, Institute of Nanostructured Functional Materials, Huanghe Science and Technology College, Zhengzhou 450006, China

---

\*Corresponding author. E-mail: dwmachina@126.com (D. Ma).

\*Corresponding author. E-mail: jiayu@henu.edu.cn (Y. Jia).

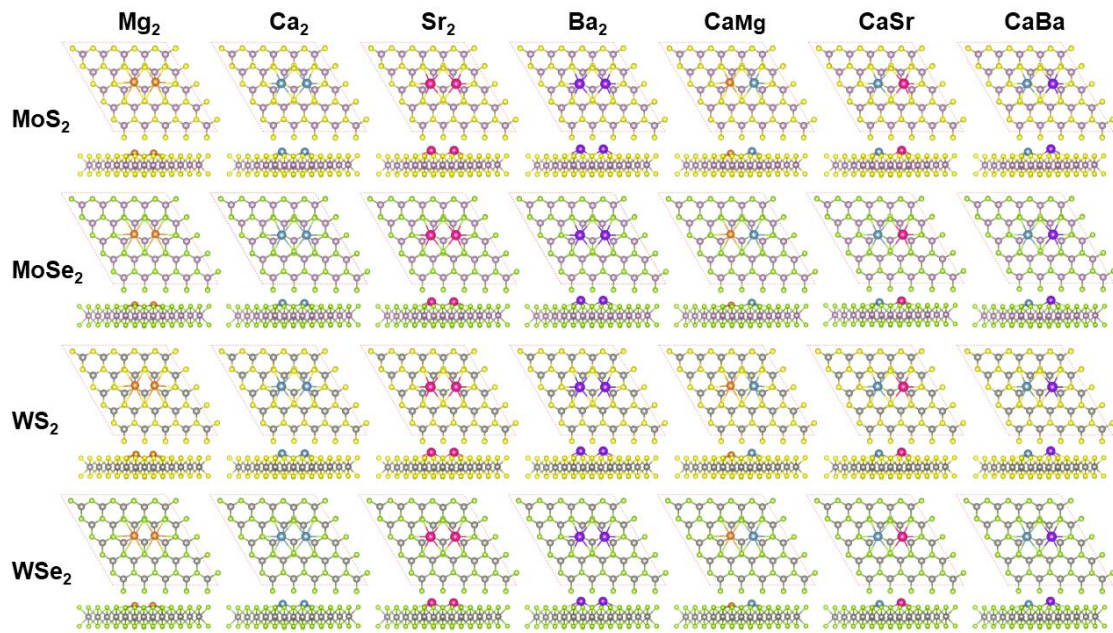

**Fig. S1.** Top and side views of the optimized configurations of  $AE_2@TMD$  DACs.

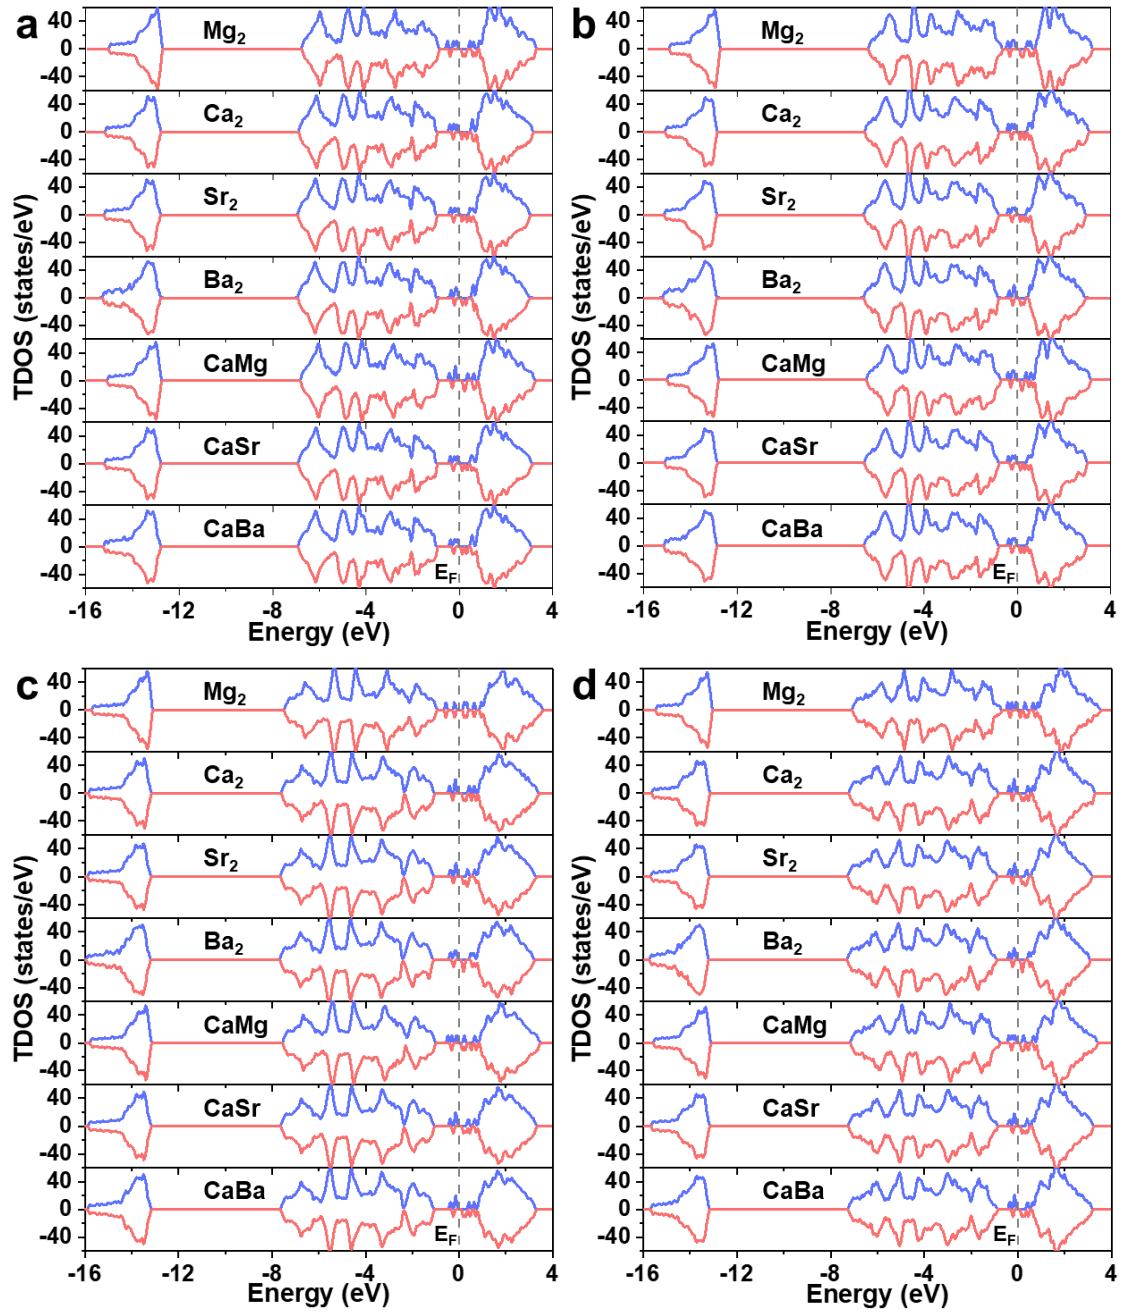

Fig. S2. Total DOS (TDOS) of the studied AE<sub>2</sub>@TMD DACs supported by MoS<sub>2</sub> (a), MoSe<sub>2</sub> (b), WS<sub>2</sub> (c), and WSe<sub>2</sub> (d).

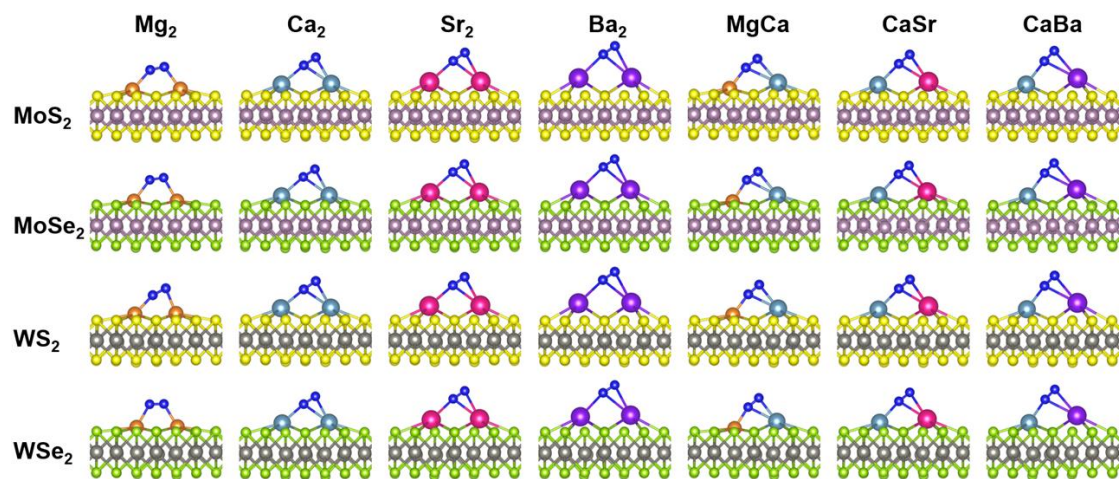

**Fig. S3.** The most favorable configurations of N<sub>2</sub> adsorption on the AE<sub>2</sub>@TMD DACs.

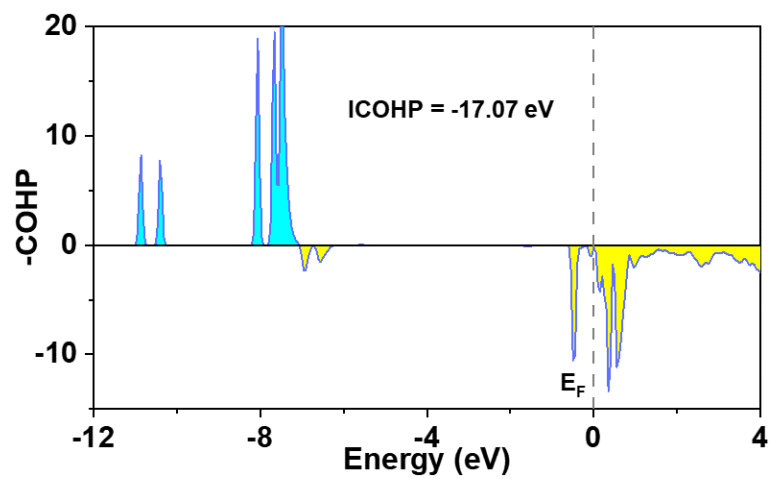

**Fig. S4.** Calculated COHP of  $^*N_2$  on  $Ca_2@WS_2$  DAC. The vertical dashed line denotes the Fermi level, and the blue and yellow fills denote the bonding and antibonding interactions, respectively.

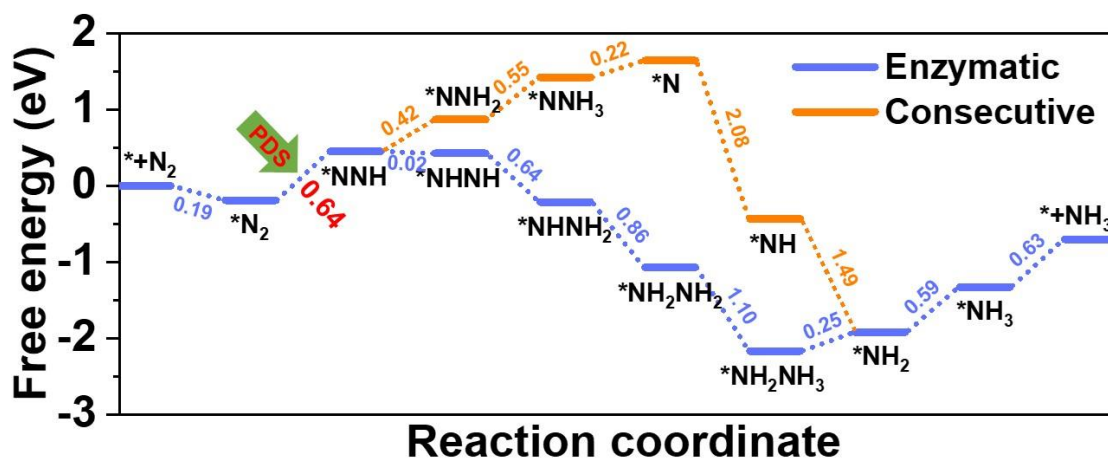

Fig. S5. Free energy diagram for NRR on CaBa@MoSe<sub>2</sub> DAC, with consideration of the solvation effect.

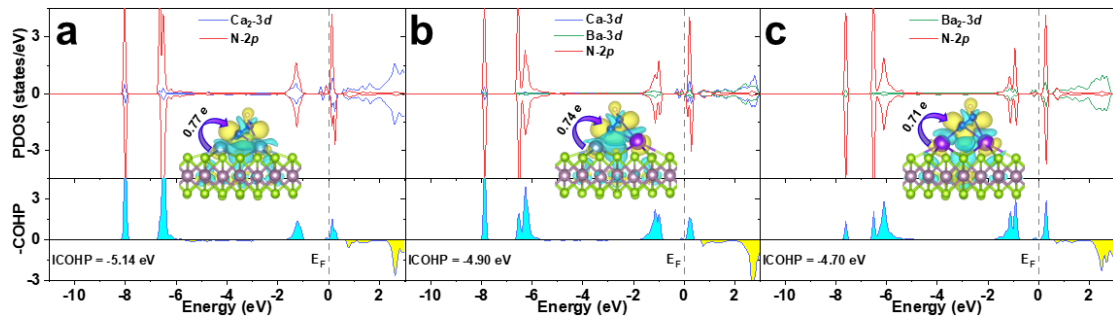

**Fig. S6.** PDOS of 3d orbitals of Ca/Ba and their bonded \*N<sub>2</sub>H, and the COHP between them for Ca<sub>2</sub>@MoSe<sub>2</sub> (a), CaBa@MoSe<sub>2</sub> (b), and Ba<sub>2</sub>@MoSe<sub>2</sub> (c). Insets are the corresponding CDD plots, where the yellow and cyan regions denote electron accumulation and depletion, respectively, with an isosurface of 0.001 e/bohr<sup>3</sup>. The vertical dashed line in denotes the Fermi level. For the COHP, the blue and yellow fills denote the bonding and antibonding interactions, respectively.

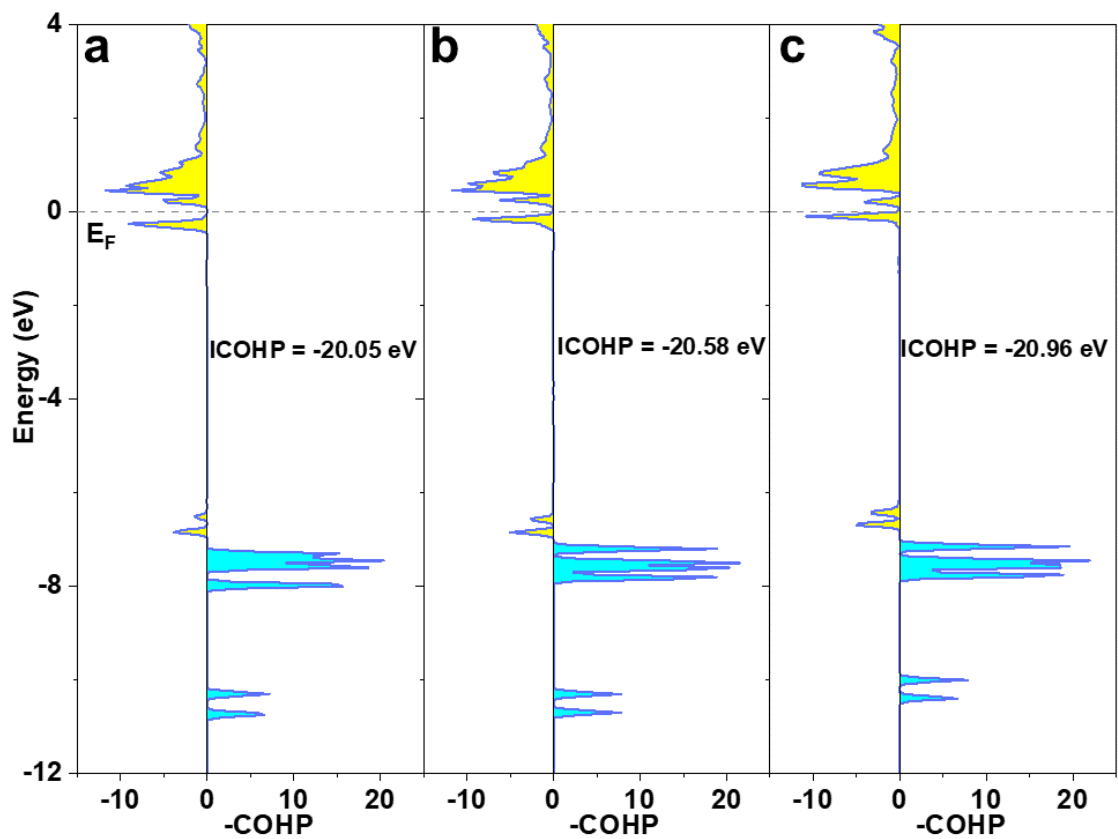

**Fig. S7.** Calculated COHP of  $^*N_2$  on  $Ca_2@MoSe_2$  (a),  $CaBa@MoSe_2$  (b), and  $Ba_2@MoSe_2$  (c) DACs. The vertical dashed line denotes the Fermi level, and the blue and yellow fills denote the bonding and antibonding interactions, respectively.



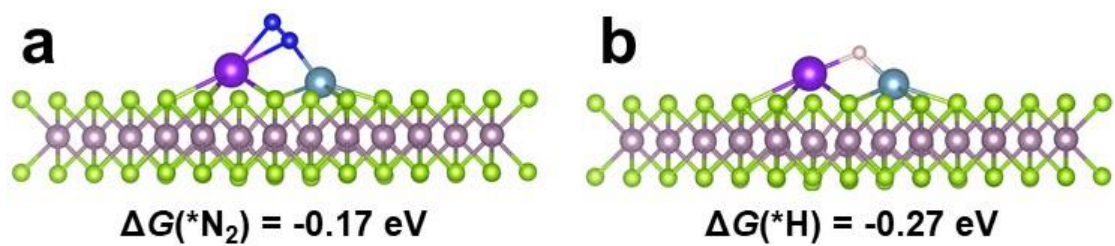

**Fig. S8.** The most favorable configurations of N<sub>2</sub> and H adsorption on the CaBa@MoSe<sub>2</sub> DAC together with the corresponding adsorption free energy.

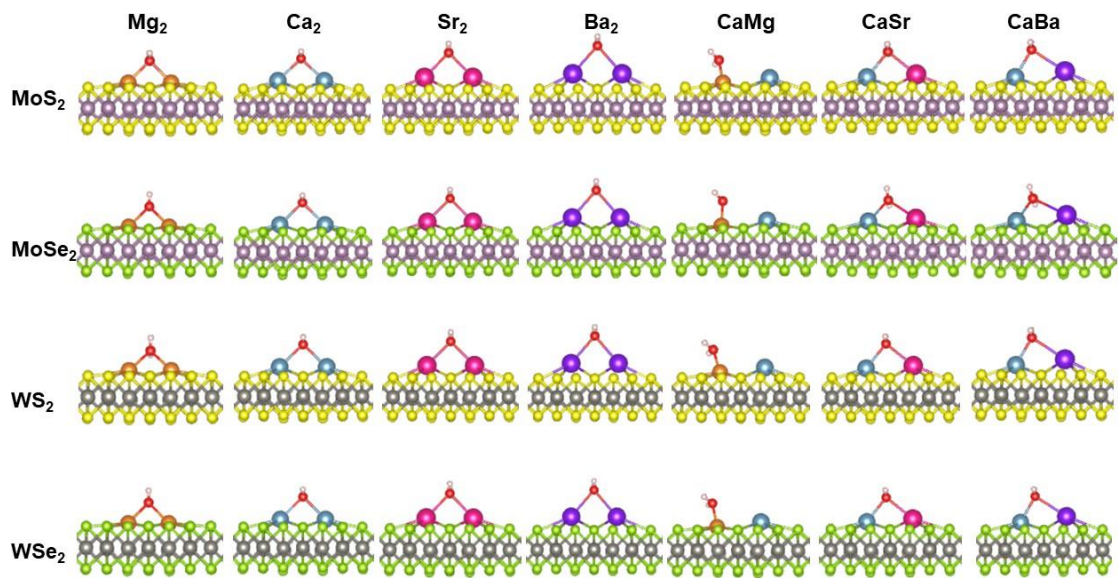

**Fig. S9.** The most stable configurations of  $\text{H}_2\text{O}$  adsorption on the  $\text{AE}_2@$ TMD DACs.

**Table S1.** Calculated zero-point energy ( $E_{ZPE}$ , in eV) and the product of temperature ( $T = 298.15$  K) and entropy ( $S$ ) ( $TS$ , in eV) of various species involved in the reaction pathways for NRR, where \* represents the adsorption site.

| Species                          | $E_{ZPE}$ | $TS$ |
|----------------------------------|-----------|------|
| *N <sub>2</sub>                  | 0.18      | 0.15 |
| *NNH                             | 0.47      | 0.15 |
| *NHNH                            | 0.78      | 0.19 |
| *NHNH <sub>2</sub>               | 1.12      | 0.18 |
| *NH <sub>2</sub> NH <sub>2</sub> | 1.24      | 0.25 |
| *NH <sub>2</sub> NH <sub>3</sub> | 1.66      | 0.29 |
| *NNH <sub>2</sub>                | 0.81      | 0.15 |
| *NNH <sub>3</sub>                | 1.13      | 0.22 |
| *N                               | 0.08      | 0.03 |
| *NH                              | 0.31      | 0.10 |
| *NH <sub>2</sub>                 | 0.66      | 0.10 |
| *NH <sub>3</sub>                 | 1.00      | 0.22 |
| N <sub>2</sub>                   | 0.15      | 0.58 |
| H <sub>2</sub>                   | 0.27      | 0.41 |
| NH <sub>3</sub>                  | 0.89      | 0.60 |

**Table S2.** Calculated dissolution potential ( $U_{\text{diss}}$ , in V) as well as  $\text{N}_2$  and  $\text{H}_2\text{O}$  adsorption free energy ( $\Delta G(^*\text{N}_2)$ ,  $\Delta G(^*\text{H}_2\text{O})$ , in eV), N-N bond length of  $^*\text{N}_2$  ( $d_{\text{N-N}}$ , in Å), the number of the electron transferred from AE dimers to TMD support for pristine DACs ( $Q_{\text{AE}}$ , in  $e$ ), and from the DACs to  $^*\text{N}_2$  on the studied  $\text{AE}_2@$ TMD DACs ( $Q_{^*\text{N}_2}$ , in  $e$ ), where the positive and negative values represent losing and gaining electrons, respectively.

| Systems                          | $U_{\text{diss}}$ | $\Delta G(^*\text{N}_2)$ | $\Delta G(^*\text{H}_2\text{O})$ | $d_{\text{N-N}}$ | $Q_{\text{AE}}$ | $Q_{^*\text{N}_2}$ |
|----------------------------------|-------------------|--------------------------|----------------------------------|------------------|-----------------|--------------------|
| $\text{Mg}_2@$ MoS <sub>2</sub>  | -1.65             | -0.13                    | -0.87                            | 1.17             | 2.51            | -0.65              |
| $\text{Ca}_2@$ MoS <sub>2</sub>  | -1.45             | -0.32                    | -0.99                            | 1.16             | 2.70            | -0.59              |
| $\text{Sr}_2@$ MoS <sub>2</sub>  | -1.36             | -0.24                    | -0.88                            | 1.16             | 2.71            | -0.57              |
| $\text{Ba}_2@$ MoS <sub>2</sub>  | -1.22             | 0.04                     | -0.66                            | 1.15             | 2.56            | -0.51              |
| $\text{CaMg}@$ MoS <sub>2</sub>  | -1.55             | -0.30                    | -1.18                            | 1.16             | 2.56            | -0.57              |
| $\text{CaSr}@$ MoS <sub>2</sub>  | -1.40             | -0.30                    | -0.95                            | 1.16             | 2.71            | -0.56              |
| $\text{CaBa}@$ MoS <sub>2</sub>  | -1.33             | -0.23                    | -0.90                            | 1.16             | 2.64            | -0.52              |
| $\text{Mg}_2@$ MoSe <sub>2</sub> | -1.62             | -0.05                    | -0.94                            | 1.17             | 2.55            | -0.65              |
| $\text{Ca}_2@$ MoSe <sub>2</sub> | -1.53             | -0.23                    | -0.91                            | 1.16             | 2.61            | -0.59              |
| $\text{Sr}_2@$ MoSe <sub>2</sub> | -1.47             | -0.16                    | -0.81                            | 1.16             | 2.61            | -0.59              |
| $\text{Ba}_2@$ MoSe <sub>2</sub> | -1.36             | 0.06                     | -0.61                            | 1.16             | 2.44            | -0.52              |
| $\text{CaMg}@$ MoSe <sub>2</sub> | -1.57             | -0.22                    | -1.11                            | 1.16             | 2.58            | -0.57              |
| $\text{CaSr}@$ MoSe <sub>2</sub> | -1.50             | -0.21                    | -1.00                            | 1.16             | 2.62            | -0.58              |
| $\text{CaBa}@$ MoSe <sub>2</sub> | -1.44             | -0.17                    | -0.98                            | 1.16             | 2.54            | -0.53              |
| $\text{Mg}_2@$ WS <sub>2</sub>   | -1.86             | -0.09                    | -0.73                            | 1.18             | 2.36            | -0.74              |
| $\text{Ca}_2@$ WS <sub>2</sub>   | -1.75             | -0.47                    | -0.97                            | 1.17             | 2.64            | -0.61              |
| $\text{Sr}_2@$ WS <sub>2</sub>   | -1.68             | -0.36                    | -0.85                            | 1.16             | 2.65            | -0.61              |
| $\text{Ba}_2@$ WS <sub>2</sub>   | -1.52             | -0.05                    | -0.63                            | 1.16             | 2.48            | -0.53              |
| $\text{CaMg}@$ WS <sub>2</sub>   | -1.82             | -0.37                    | -1.11                            | 1.17             | 2.45            | -0.66              |
| $\text{CaSr}@$ WS <sub>2</sub>   | -1.71             | -0.44                    | -0.93                            | 1.16             | 2.64            | -0.61              |
| $\text{CaBa}@$ WS <sub>2</sub>   | -1.63             | -0.35                    | -0.88                            | 1.16             | 2.57            | -0.56              |
| $\text{Mg}_2@$ WSe <sub>2</sub>  | -1.86             | -0.19                    | -0.86                            | 1.18             | 2.52            | -0.74              |
| $\text{Ca}_2@$ WSe <sub>2</sub>  | -1.82             | -0.37                    | -0.90                            | 1.17             | 2.56            | -0.63              |
| $\text{Sr}_2@$ WSe <sub>2</sub>  | -1.77             | -0.31                    | -0.79                            | 1.17             | 2.55            | -0.64              |
| $\text{Ba}_2@$ WSe <sub>2</sub>  | -1.64             | -0.04                    | -0.58                            | 1.16             | 2.37            | -0.56              |
| $\text{CaMg}@$ WSe <sub>2</sub>  | -1.84             | -0.36                    | -1.08                            | 1.17             | 2.50            | -0.68              |
| $\text{CaSr}@$ WSe <sub>2</sub>  | -1.80             | -0.35                    | -0.86                            | 1.17             | 2.56            | -0.62              |
| $\text{CaBa}@$ WSe <sub>2</sub>  | -1.73             | -0.32                    | -0.82                            | 1.16             | 2.47            | -0.58              |

**Table S3.** Calculated limiting potential ( $U_L$ , in V), potential-determining step (PDS), and reaction free energy of the first hydrogenation ( $*N_2 + H^+ + e \rightarrow *N_2H$ ) ( $\Delta G_1$ , in eV) and last hydrogenation ( $*NH_2 + H^+ + e \rightarrow *NH_3$ ) ( $\Delta G_6$ , in eV) for NRR on the studied  $AE_2@TMD$  DACs.

| Systems                            | $U_L$ | PDS                                 | $\Delta G_1$ | $\Delta G_6$ |
|------------------------------------|-------|-------------------------------------|--------------|--------------|
| Mg <sub>2</sub> @MoS <sub>2</sub>  | -0.93 | *NH <sub>2</sub> → *NH <sub>3</sub> | 0.42         | 0.93         |
| Ca <sub>2</sub> @MoS <sub>2</sub>  | -0.97 | *NH <sub>2</sub> → *NH <sub>3</sub> | 0.45         | 0.97         |
| Sr <sub>2</sub> @MoS <sub>2</sub>  | -0.97 | *NH <sub>2</sub> → *NH <sub>3</sub> | 0.55         | 0.97         |
| Ba <sub>2</sub> @MoS <sub>2</sub>  | -0.71 | *N <sub>2</sub> → *N <sub>2</sub> H | 0.71         | 0.68         |
| CaMg@MoS <sub>2</sub>              | -0.83 | *NH <sub>2</sub> → *NH <sub>3</sub> | 0.39         | 0.83         |
| CaSr@MoS <sub>2</sub>              | -0.92 | *NH <sub>2</sub> → *NH <sub>3</sub> | 0.53         | 0.92         |
| CaBa@MoS <sub>2</sub>              | -0.75 | *NH <sub>2</sub> → *NH <sub>3</sub> | 0.61         | 0.75         |
| Mg <sub>2</sub> @MoSe <sub>2</sub> | -0.78 | *NH <sub>2</sub> → *NH <sub>3</sub> | 0.39         | 0.78         |
| Ca <sub>2</sub> @MoSe <sub>2</sub> | -0.77 | *NH <sub>2</sub> → *NH <sub>3</sub> | 0.46         | 0.77         |
| Sr <sub>2</sub> @MoSe <sub>2</sub> | -0.79 | *NH <sub>2</sub> → *NH <sub>3</sub> | 0.54         | 0.79         |
| Ba <sub>2</sub> @MoSe <sub>2</sub> | -0.67 | *N <sub>2</sub> → *N <sub>2</sub> H | 0.67         | 0.46         |
| CaMg@MoSe <sub>2</sub>             | -0.70 | *NH <sub>2</sub> → *NH <sub>3</sub> | 0.38         | 0.70         |
| CaSr@MoSe <sub>2</sub>             | -0.70 | *NH <sub>2</sub> → *NH <sub>3</sub> | 0.52         | 0.70         |
| CaBa@MoSe <sub>2</sub>             | -0.60 | *N <sub>2</sub> → *N <sub>2</sub> H | 0.60         | 0.56         |
| Mg <sub>2</sub> @WS <sub>2</sub>   | -0.86 | *NH <sub>2</sub> → *NH <sub>3</sub> | 0.37         | 0.86         |
| Ca <sub>2</sub> @WS <sub>2</sub>   | -1.13 | *NH <sub>2</sub> → *NH <sub>3</sub> | 0.37         | 1.13         |
| Sr <sub>2</sub> @WS <sub>2</sub>   | -1.10 | *NH <sub>2</sub> → *NH <sub>3</sub> | 0.51         | 1.10         |
| Ba <sub>2</sub> @WS <sub>2</sub>   | -0.66 | *N <sub>2</sub> → *N <sub>2</sub> H | 0.66         | 0.61         |
| CaMg@WS <sub>2</sub>               | -0.91 | *NH <sub>2</sub> → *NH <sub>3</sub> | 0.24         | 0.91         |
| CaSr@WS <sub>2</sub>               | -1.05 | *NH <sub>2</sub> → *NH <sub>3</sub> | 0.46         | 1.05         |
| CaBa@WS <sub>2</sub>               | -0.87 | *NH <sub>2</sub> → *NH <sub>3</sub> | 0.56         | 0.87         |
| Mg <sub>2</sub> @WSe <sub>2</sub>  | -1.06 | *NH <sub>2</sub> → *NH <sub>3</sub> | 0.38         | 1.06         |
| Ca <sub>2</sub> @WSe <sub>2</sub>  | -1.09 | *NH <sub>2</sub> → *NH <sub>3</sub> | 0.39         | 1.09         |
| Sr <sub>2</sub> @WSe <sub>2</sub>  | -1.04 | *NH <sub>2</sub> → *NH <sub>3</sub> | 0.53         | 1.04         |
| Ba <sub>2</sub> @WSe <sub>2</sub>  | -0.80 | *N <sub>2</sub> → *N <sub>2</sub> H | 0.80         | 0.67         |
| CaMg@WSe <sub>2</sub>              | -1.02 | *NH <sub>2</sub> → *NH <sub>3</sub> | 0.28         | 1.02         |
| CaSr@WSe <sub>2</sub>              | -1.03 | *NH <sub>2</sub> → *NH <sub>3</sub> | 0.47         | 1.03         |
| CaBa@WSe <sub>2</sub>              | -0.87 | *NH <sub>2</sub> → *NH <sub>3</sub> | 0.62         | 0.87         |
